# Supplementary material
Source: PubMed Central journal article supplement (PMC1569177)

$\alpha$ -zpr1 (cones)

WT

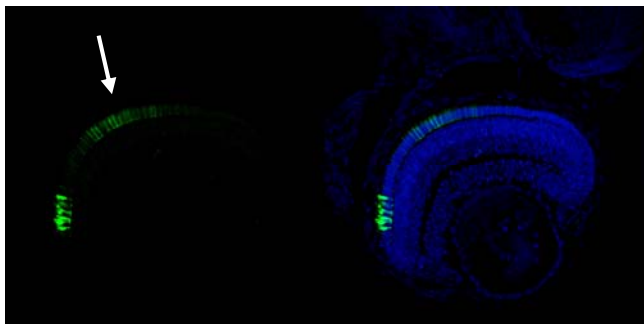

APC<sup>mt</sup> +V.

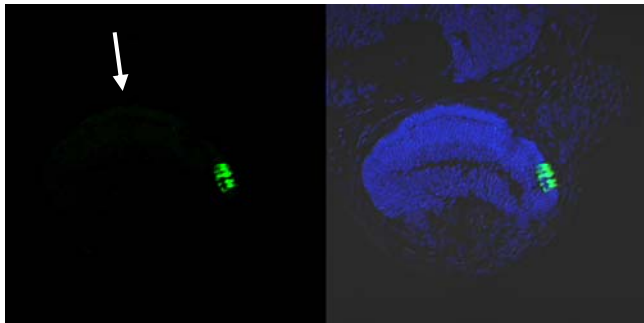

APC<sup>mt</sup> +RA

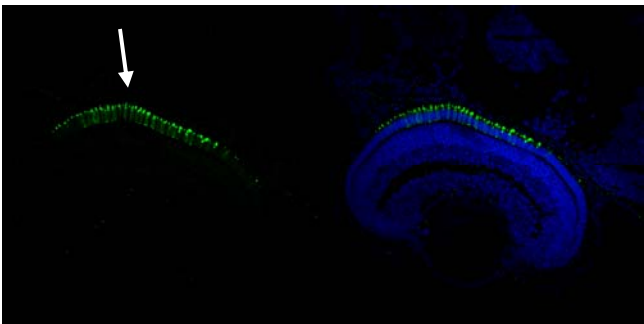

$\alpha$ -zpr1

$\alpha$ -zpr1 +DAPI

Supplement: pnas_0601634103_2.pdf [file pnas_0601634103_2.pdf]
